# Supplementary material for: Rheology of soft colloids across the onset of rigidity: scaling behavior, thermal, and non-thermal responses
Source: Royal Society of Chemistry journal article supplement (doi:10.1039/c3sm52454j), 2014-01-01
Supplement: c3sm52454j1.dat [file c3sm52454j1.dat]

5.335	2.164	0.5785	294
3	2.041	0.4406	294
1.687	1.934	0.3476	294
0.9487	1.852	0.2825	294
0.5335	1.784	0.2433	294
0.3	1.723	0.2227	294
0.1687	1.677	0.2085	294
0.09487	1.643	0.2029	294
5	1.844	0.4708	294.5
2.321	1.691	0.3322	294.5
1.077	1.589	0.2441	294.5
0.5	1.512	0.2032	294.5
0.2321	1.451	0.1801	294.5
0.1077	1.405	0.1732	294.5
0.05	1.371	0.1763	294.5
5	1.565	0.4073	295.1
2.812	1.479	0.3111	295.1
1.581	1.416	0.2447	295.1
0.8891	1.356	0.1974	295.1
0.5	1.307	0.1725	295.1
0.2812	1.259	0.16	295.1
0.1581	1.224	0.1551	295.1
0.08891	1.193	0.156	295.1
0.05	1.168	0.1616	295.1
6.463	1.427	0.4044	295.6
3	1.284	0.2834	295.6
1.392	1.184	0.205	295.6
0.6463	1.11	0.1651	295.6
0.3	1.052	0.1498	295.6
0.1392	1.002	0.1498	295.6
0.06463	0.9631	0.158	295.6
0.03	0.926	0.1769	295.6
5.335	1.127	0.3323	296.1
3	1.066	0.2511	296.1
1.687	1.009	0.2012	296.1
0.9487	0.9595	0.1715	296.1
0.5335	0.9144	0.1548	296.1
0.3	0.8696	0.1479	296.1
0.1687	0.8324	0.1505	296.1
0.09487	0.7981	0.1587	296.1
0.05335	0.7674	0.1715	296.1
