# Supplementary material for: Rheology of soft colloids across the onset of rigidity: scaling behavior, thermal, and non-thermal responses
Source: Royal Society of Chemistry journal article supplement (doi:10.1039/c3sm52454j), 2014-01-01
Supplement: c3sm52454j2.dat [file c3sm52454j2.dat]

5.335	1.385	0.4407	291.5
3	1.277	0.3311	291.5
1.687	1.187	0.254	291.5
0.9487	1.117	0.2049	291.5
0.5335	1.067	0.1747	291.5
0.3	1.029	0.1547	291.5
0.1687	0.9876	0.1458	291.5
0.09487	0.9575	0.1437	291.5
0.05335	0.9274	0.1537	291.5
5.335	1.215	0.3916	292
3	1.114	0.2872	292
1.687	1.032	0.2168	292
0.9487	0.9781	0.1783	292
0.5335	0.934	0.1426	292
0.3	0.8925	0.1217	292
0.1687	0.8574	0.1136	292
0.09487	0.8238	0.1155	292
0.05335	0.7945	0.1248	292
5.335	1.057	0.344	292.5
3	0.9592	0.2669	292.5
1.687	0.8898	0.1888	292.5
0.9487	0.8402	0.1548	292.5
0.5335	0.8031	0.1263	292.5
0.3	0.7643	0.1106	292.5
0.1687	0.7283	0.1058	292.5
0.09487	0.7	0.1076	292.5
0.05335	0.6695	0.1169	292.5
5.335	0.9365	0.3477	293.1
3	0.8343	0.2754	293.1
1.687	0.756	0.2194	293.1
0.9487	0.6996	0.196	293.1
0.5335	0.6574	0.1823	293.1
0.3	0.6092	0.1722	293.1
0.1687	0.5761	0.1684	293.1
0.09487	0.5456	0.1706	293.1
0.05335	0.519	0.1831	293.1
5.335	0.7912	0.2813	293.5
3	0.7229	0.2091	293.5
1.687	0.6658	0.1678	293.5
0.9487	0.6088	0.144	293.5
0.5335	0.5761	0.121	293.5
0.3	0.5476	0.1104	293.5
0.1687	0.5166	0.1064	293.5
0.09487	0.4902	0.1061	293.5
0.05335	0.462	0.1112	293.5
5.335	0.7103	0.2728	294.1
3	0.6174	0.2044	294.1
1.687	0.5675	0.1767	294.1
0.9487	0.5153	0.1384	294.1
0.5335	0.4688	0.1249	294.1
0.3	0.4312	0.1198	294.1
0.1687	0.4018	0.1195	294.1
0.09487	0.3748	0.1225	294.1
0.05335	0.3465	0.1298	294.1
