# Supplementary material for: Rheology of soft colloids across the onset of rigidity: scaling behavior, thermal, and non-thermal responses
Source: Royal Society of Chemistry journal article supplement (doi:10.1039/c3sm52454j), 2014-01-01
Supplement: c3sm52454j4.dat [file c3sm52454j4.dat]

5	1.056	291
2.812	0.8332	291
1.581	0.6747	291
0.8891	0.562	291
0.5	0.4774	291
0.2812	0.4119	291
0.1581	0.3599	291
0.08893	0.3195	291
0.04998	0.2866	291
0.02811	0.2597	291
0.01581	0.2377	291
0.00888	0.2193	291
0.005	0.2035	291
5	0.8365	292
2.812	0.6542	292
1.581	0.5267	292
0.8892	0.4334	292
0.5	0.3636	292
0.2812	0.3113	292
0.1581	0.2706	292
0.08892	0.2381	292
0.05	0.2123	292
0.02813	0.1915	292
0.0158	0.1749	292
0.0089	0.1608	292
0.00499	0.1492	292
5	0.6565	293
2.812	0.5077	293
1.581	0.4041	293
0.8891	0.3307	293
0.5	0.276	293
0.2812	0.2338	293
0.1581	0.2016	293
0.08892	0.1757	293
0.05	0.1555	293
0.02811	0.1394	293
0.01581	0.127	293
0.00889	0.1166	293
0.005	0.1075	293
2.812	0.3914	294
1.581	0.309	294
0.8892	0.25	294
0.5	0.2051	294
0.2812	0.1722	294
0.1581	0.1467	294
0.08891	0.1272	294
0.04999	0.1127	294
0.02811	0.1008	294
0.01581	0.09134	294
0.00889	0.08371	294
0.005	0.07732	294
2.812	0.2973	295
1.581	0.2328	295
0.8891	0.1855	295
0.5	0.1531	295
0.2812	0.1279	295
0.1581	0.1083	295
0.08892	0.0931	295
0.05	0.08181	295
0.02812	0.07254	295
0.01581	0.06544	295
0.00889	0.05962	295
0.005	0.05474	295
2.812	0.2272	296
1.581	0.1741	296
0.8891	0.1392	296
0.5	0.1117	296
0.2812	0.09099	296
0.1581	0.0758	296
0.08891	0.06452	296
0.05	0.05588	296
0.02811	0.04848	296
0.01582	0.04298	296
0.00889	0.03885	296
0.005	0.03516	296
1.581	0.1311	297
0.8891	0.1002	297
0.5	0.08069	297
0.2812	0.06582	297
0.1581	0.05443	297
0.08892	0.0457	297
0.05	0.0389	297
0.02811	0.03326	297
0.01581	0.02888	297
0.00889	0.02528	297
0.005	0.02193	297
1.581	0.09434	298
0.8891	0.07374	298
0.5	0.05728	298
0.2812	0.04393	298
0.1581	0.0343	298
0.08891	0.02682	298
0.05	0.02103	298
0.02812	0.01578	298
0.01581	0.01175	298
0.00889	0.00838	298
0.005	0.00544	298
1.581	0.06956	299
0.8892	0.05	299
0.5	0.03703	299
0.2812	0.02815	299
0.1581	0.02101	299
0.08891	0.01493	299
0.05	0.01041	299
0.02812	0.00703	299
0.01581	0.00453	299
0.00889	0.00292	299
0.005	0.00204	299
0.8891	0.03427	300
0.5	0.0244	300
0.2812	0.01634	300
0.1581	0.01011	300
0.08891	0.00579	300
0.04999	0.00315	300
0.02812	0.00137	300
0.01581	0.000553	300
0.0089	0.000259	300
0.00501	-1.21e-05	300
0.8892	0.0213	301
0.5	0.0124	301
0.2812	0.00757	301
0.1581	0.00555	301
0.08891	0.00335	301
0.5	0.00889	302
0.2812	0.00581	302
0.1581	0.00368	302
