# Supplementary material for: Rheology of soft colloids across the onset of rigidity: scaling behavior, thermal, and non-thermal responses
Source: Royal Society of Chemistry journal article supplement (doi:10.1039/c3sm52454j), 2014-01-01
Supplement: c3sm52454j5.dat [file c3sm52454j5.dat]

2.812	0.4137	289
1.581	0.3185	289
0.8891	0.2512	289
0.5	0.2024	289
0.2812	0.1656	289
0.1581	0.138	289
0.08892	0.1168	289
0.05	0.1003	289
0.02812	0.0873	289
0.01581	0.07702	289
0.00889	0.06874	289
0.00499	0.06162	289
2.812	0.3244	290
1.581	0.248	290
0.8891	0.1944	290
0.5	0.1549	290
0.2812	0.1257	290
0.1581	0.1042	290
0.08891	0.0879	290
0.05	0.07517	290
0.02812	0.06556	290
0.01581	0.05772	290
0.00889	0.05166	290
0.005	0.04636	290
2.812	0.2608	291
1.581	0.1976	291
0.8891	0.1525	291
0.5	0.1213	291
0.2812	0.09855	291
0.1581	0.08118	291
0.08891	0.06808	291
0.05	0.05794	291
0.02812	0.05021	291
0.01581	0.044	291
0.00889	0.03923	291
0.005	0.03499	291
2.812	0.2099	292
1.581	0.1568	292
0.8891	0.1214	292
0.5	0.09545	292
0.2812	0.07678	292
0.1581	0.06213	292
0.08891	0.05175	292
0.04999	0.0439	292
0.02812	0.03711	292
0.01581	0.03229	292
0.00889	0.02828	292
0.00501	0.02469	292
1.581	0.1249	293
0.8891	0.09471	293
0.5	0.07349	293
0.2812	0.0589	293
0.1581	0.04802	293
0.08892	0.03956	293
0.04999	0.03312	293
0.02811	0.02814	293
0.01581	0.02411	293
0.00889	0.02078	293
0.005	0.01802	293
1.581	0.09803	294
0.8892	0.07487	294
0.5	0.05788	294
0.2812	0.04523	294
0.1581	0.03574	294
0.08892	0.02869	294
0.05	0.02327	294
0.02812	0.0192	294
0.01581	0.01562	294
0.00889	0.01265	294
0.00499	0.01015	294
1.581	0.07767	295
0.8891	0.05751	295
0.5	0.04339	295
0.2812	0.03337	295
0.1581	0.02611	295
0.08891	0.02052	295
0.05	0.01591	295
0.02812	0.01229	295
0.01581	0.00941	295
0.0089	0.00708	295
0.005	0.00505	295
0.8891	0.04435	296
0.5	0.03366	296
0.2812	0.02502	296
0.1581	0.01869	296
0.08892	0.01365	296
0.05	0.00968	296
0.02812	0.00672	296
0.01581	0.00432	296
0.00889	0.00264	296
0.005	0.00155	296
0.8892	0.03426	297
0.5	0.02419	297
0.2812	0.01698	297
0.1581	0.0117	297
0.0889	0.00778	297
0.05	0.00499	297
0.02811	0.00303	297
0.01581	0.00199	297
0.00889	0.00116	297
0.005	0.000608	297
0.8891	0.02479	298
0.5	0.01791	298
0.2812	0.01222	298
0.1581	0.00793	298
0.08891	0.00505	298
0.04999	0.00319	298
0.02812	0.00195	298
0.01581	0.00127	298
0.5	0.01173	299
0.2812	0.00701	299
0.1581	0.00409	299
0.08892	0.00201	299
0.05	0.00121	299
0.02811	0.000385	299
0.01581	0.000107	299
0.2812	0.00282	301
0.1581	0.00134	301
0.08892	0.000563	301
0.05	0.000243	301
0.02812	5.74e-05	301
